# Supplementary material for: In situ, seed-free formation of a Ruddlesden–Popper perovskite Cs2PbI2Cl2 nanowires/PbI2 heterojunction for a high-responsivity, self-powered photodetector
Source: Royal Society of Chemistry journal article supplement (doi:10.1039/d1tc05538k), 2022-01-01
Supplement: d1tc05538k1.pdf [file d1tc05538k1.pdf]

## Supporting Information

### **In-Situ, Seed-Free Formation of Ruddlesden–Popper Perovskite Cs<sub>2</sub>PbI<sub>2</sub>Cl<sub>2</sub> Nanowires/PbI<sub>2</sub> Heterojunction for High-Responsivity, Self-Powered Photodetector**

Yanshuang Ba,<sup>a,#</sup> Xiaoping Xie,<sup>b,#</sup> Weidong Zhu,<sup>a,\*</sup> JunXiao Ma,<sup>a</sup> Gang Liu,<sup>b</sup> Peng Dong,<sup>b</sup> Dazheng Chen,<sup>a</sup> Jincheng Zhang,<sup>a</sup> Chunfu Zhang,<sup>a</sup> Yue Hao<sup>a</sup>

<sup>a</sup>State Key Discipline Laboratory of Wide Band Gap Semiconductor Technology & Shaanxi Joint Key Laboratory of Graphene, School of Microelectronics, Xidian University, Xi'an, 710071, P.R. China.

<sup>b</sup>Qinghai Huanghe Hydropower Development CO., LTD., Xining, Qinghai 810008, China.

<sup>#</sup>The authors contribute equally to this work.

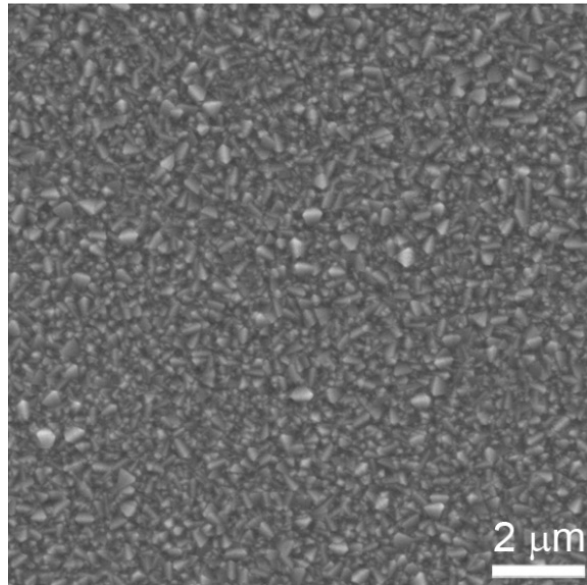

**Figure S1.** Surficial SEM image of FTO/TiO<sub>2</sub> substrate.

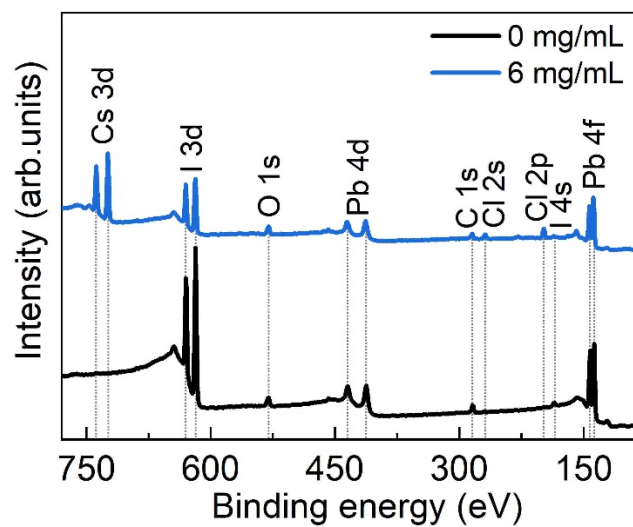

**Figure S2.** XPS survey spectra of PbI<sub>2</sub> film and Cs<sub>2</sub>PbI<sub>2</sub>Cl<sub>2</sub> nanowires/PbI<sub>2</sub> heterojunction obtained with 6 mg/mL CsCl/MeOH.

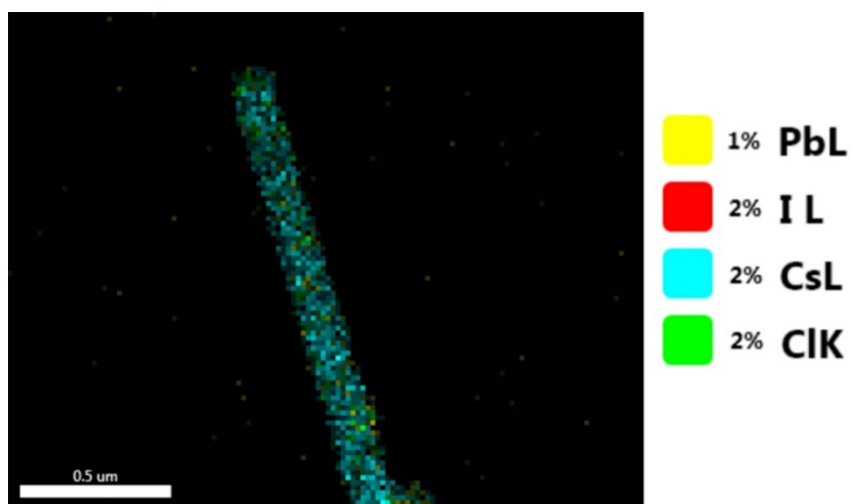

**Figure S3.** EDS mapping image of a  $\text{Cs}_2\text{PbI}_2\text{Cl}_2$  nanowire.

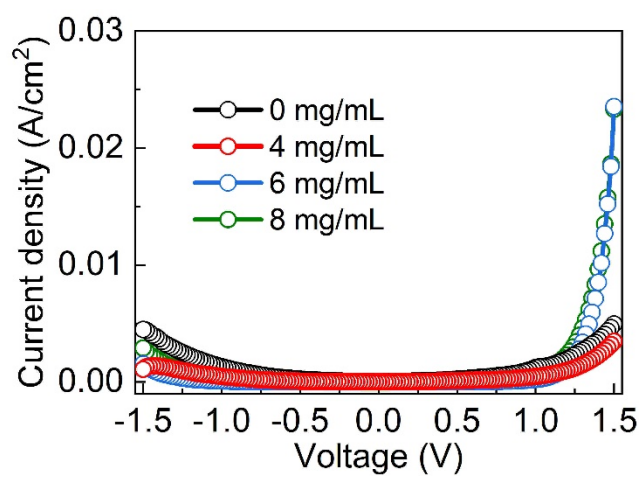

**Figure S4.** Linear-scale dark J-V curves of self-powered PDs fabricated with pristine  $\text{PbI}_2$  film and  $\text{Cs}_2\text{PbI}_2\text{Cl}_2$  nanowires/ $\text{PbI}_2$  heterojunctions formed with 4, 6, and 8 mg/mL CsCl/MeOH.

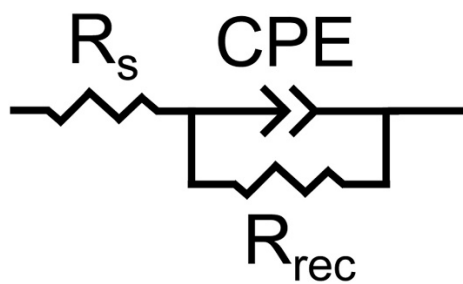

**Figure S5.** Equivalent circuit model for fitting the EIS Nyquist curves of self-powered PDs fabricated with pristine  $\text{PbI}_2$  film and  $\text{Cs}_2\text{PbI}_2\text{Cl}_2$  nanowires/ $\text{PbI}_2$  heterojunction produced with 6 mg/mL  $\text{CsCl}/\text{MeOH}$ .
